# Supplementary material for: Ultra-fast synthesis and thermoelectric properties of Te doped skutterudites
Source: Royal Society of Chemistry journal article supplement (doi:10.1039/c4ta02780a), 2014-09-04
Supplement: c4ta02780a1.pdf [file c4ta02780a1.pdf]

## **Electronic Supplementary Information (ESI)**

### **Ultra-fast synthesis and thermoelectric properties of Te doped skutterudites**

**Tao Liang,<sup>a</sup> Xianli Su,<sup>a</sup> Yonggao Yan,<sup>a</sup> Gang Zheng,<sup>a</sup> Qiang Zhang,<sup>a</sup>  
Hang Chi,<sup>b</sup> Xinfeng Tang,<sup>\* a</sup> and Ctirad Uher<sup>b</sup>**

*<sup>a</sup>State Key Laboratory of Advanced Technology for Materials Synthesis and Processing, Wuhan University of Technology, Wuhan 43007, China*

*Email: tangxf@whut.edu.cn*

*<sup>b</sup>Department of Physics, University of Michigan, Ann Arbor, Michigan 48109, USA*

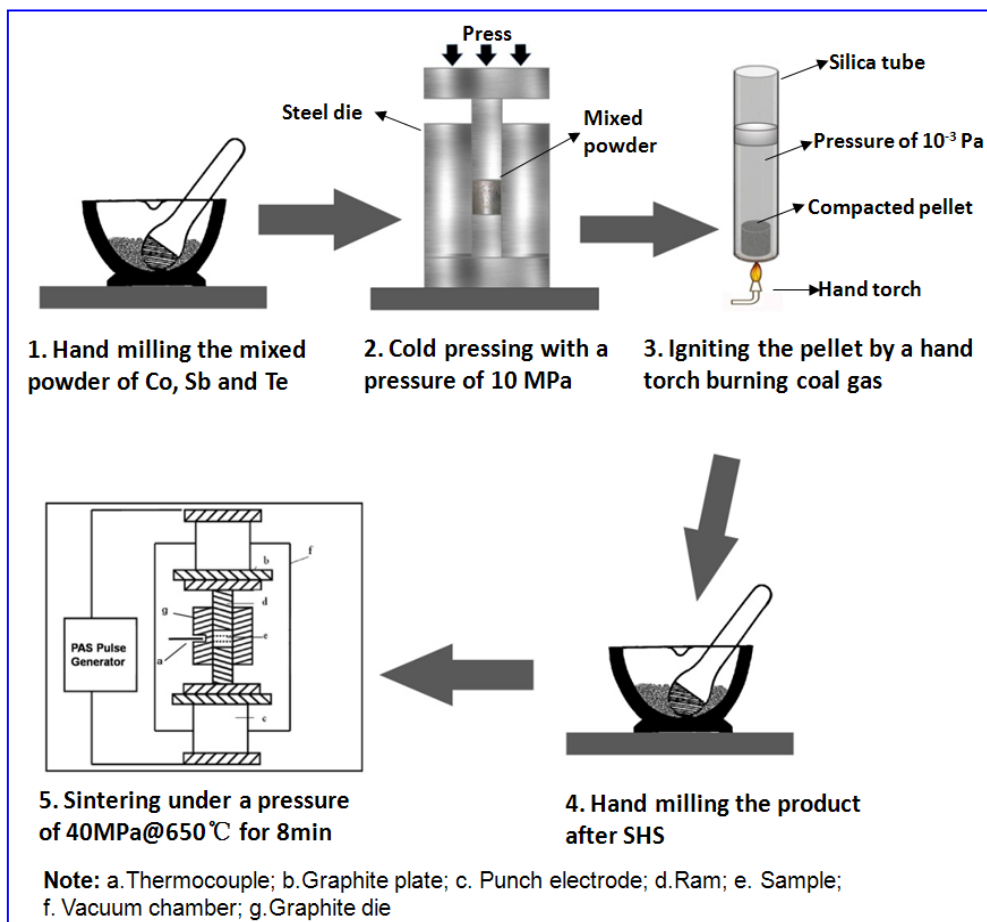

**Fig. S1.** Sketch of the specimen synthetic processing

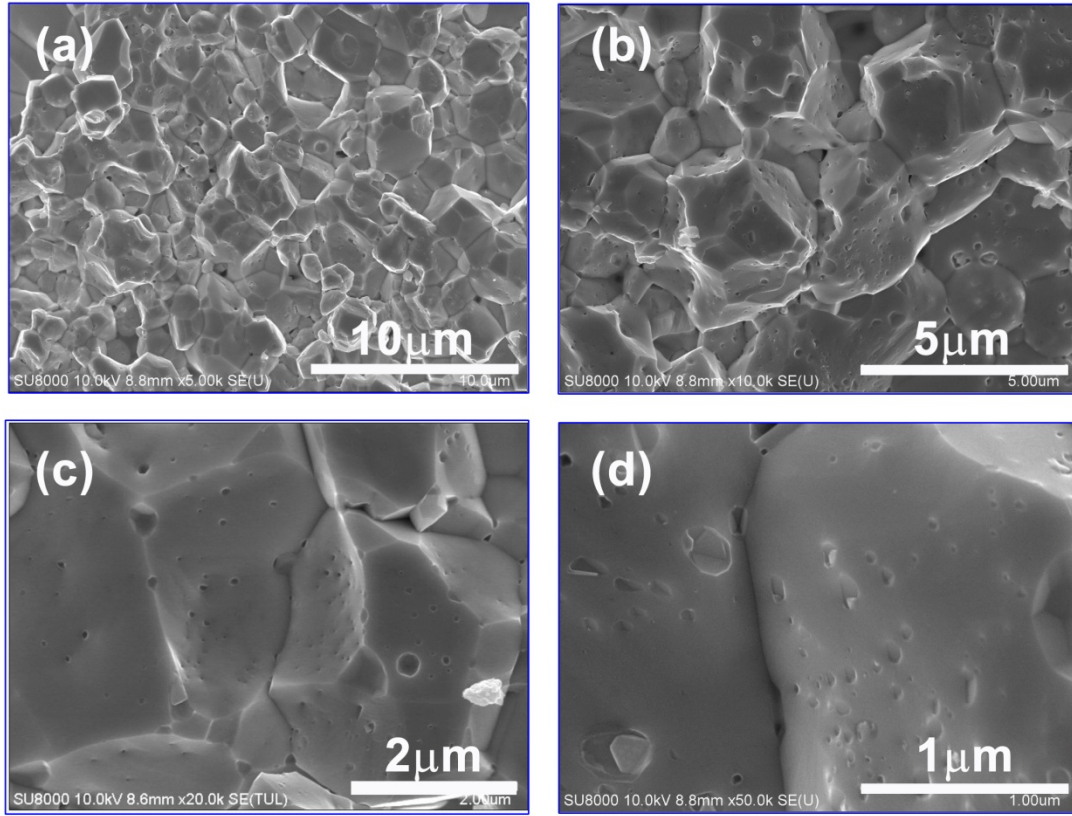

**Fig. S2.** FESEM image of the bulk  $\text{CoSb}_{2.85}\text{Te}_{0.15}$  compound after SHS-PAS processing, the magnification of image (a), (b), (c), (d) is 5 k, 10 k, 20 k, 50 k, respectively.
